# Supplementary material for: Contrasting patterns of Y chromosome variation in Ashkenazi Jewish and host non-Jewish European populations
Source: Springer Nature journal article supplement (doi:10.1007/s00439-003-1073-7), 2004-01-24
Supplement: supp.pdf [file supp.pdf]

## Supplementary Material 1

### Y- Chromosome Haplogroup Frequencies in Ashkenazi Jews and Hungarians

| Population                     | n          | E-<br>SRY <sub>4064</sub> | E-<br>P1 | E-<br>M35 | E-<br>M78 | E-<br>M81 | F-<br>P14* | G-<br>M201* | G-<br>P15 | H-<br>M52 | I-<br>P19 | J-<br>12f2b* | J-<br>M172 | K-<br>M9* | L-<br>M20 | N-<br>LLY22g | P-<br>P27* | Q-<br>P36 | R-<br>M173* | R-<br>M17  | R-<br>P25  |
|--------------------------------|------------|---------------------------|----------|-----------|-----------|-----------|------------|-------------|-----------|-----------|-----------|--------------|------------|-----------|-----------|--------------|------------|-----------|-------------|------------|------------|
| <b>Ashkenazi Jews (AJ)</b>     | <b>442</b> | <b>2</b>                  | <b>1</b> | <b>71</b> | <b>12</b> | <b>4</b>  | <b>4</b>   | <b>34</b>   | <b>9</b>  | <b>0</b>  | <b>18</b> | <b>84</b>    | <b>84</b>  | <b>9</b>  | <b>1</b>  | <b>1</b>     | <b>2</b>   | <b>23</b> | <b>6</b>    | <b>33</b>  | <b>44</b>  |
| <i>Western Ashkenazi (WAJ)</i> | <i>112</i> | <i>1</i>                  | <i>0</i> | <i>8</i>  | <i>2</i>  | <i>0</i>  | <i>1</i>   | <i>7</i>    | <i>1</i>  | <i>0</i>  | <i>5</i>  | <i>27</i>    | <i>19</i>  | <i>0</i>  | <i>1</i>  | <i>0</i>     | <i>1</i>   | <i>8</i>  | <i>5</i>    | <i>11</i>  | <i>15</i>  |
| French (FrJ)                   | 50         | 1                         | 0        | 4         | 0         | 0         | 1          | 2           | 0         | 0         | 1         | 13           | 14         | 0         | 0         | 0            | 0          | 3         | 2           | 4          | 5          |
| German (GeJ)                   | 39         | 0                         | 0        | 1         | 1         | 0         | 0          | 3           | 1         | 0         | 1         | 11           | 3          | 0         | 1         | 0            | 1          | 5         | 3           | 4          | 4          |
| Dutch (NeJ)                    | 23         | 0                         | 0        | 3         | 1         | 0         | 0          | 2           | 0         | 0         | 3         | 3            | 2          | 0         | 0         | 0            | 0          | 0         | 0           | 3          | 6          |
| <i>Eastern Ashkenazi (EAJ)</i> | <i>330</i> | <i>1</i>                  | <i>1</i> | <i>63</i> | <i>10</i> | <i>4</i>  | <i>3</i>   | <i>27</i>   | <i>8</i>  | <i>0</i>  | <i>13</i> | <i>57</i>    | <i>65</i>  | <i>9</i>  | <i>0</i>  | <i>1</i>     | <i>1</i>   | <i>15</i> | <i>1</i>    | <i>22</i>  | <i>29</i>  |
| Austro-Hungarian (AuJ)         | 39         | 0                         | 0        | 8         | 0         | 2         | 1          | 5           | 0         | 0         | 0         | 8            | 4          | 0         | 0         | 0            | 0          | 1         | 0           | 6          | 4          |
| Belorussian (BeJ)              | 40         | 0                         | 0        | 10        | 0         | 1         | 0          | 2           | 4         | 0         | 2         | 5            | 5          | 1         | 0         | 0            | 1          | 1         | 0           | 2          | 6          |
| Lithuania (LiJ)                | 37         | 0                         | 1        | 6         | 0         | 0         | 0          | 5           | 1         | 0         | 2         | 6            | 8          | 0         | 0         | 0            | 0          | 1         | 0           | 0          | 7          |
| Polish (PoJ)                   | 58         | 0                         | 0        | 5         | 2         | 1         | 0          | 5           | 1         | 0         | 2         | 10           | 18         | 1         | 0         | 0            | 0          | 4         | 0           | 6          | 3          |
| Romanian (RoJ)                 | 47         | 0                         | 0        | 10        | 1         | 0         | 0          | 5           | 1         | 0         | 4         | 8            | 11         | 0         | 0         | 0            | 0          | 2         | 0           | 2          | 3          |
| Russian (RuJ)                  | 54         | 0                         | 0        | 11        | 2         | 0         | 2          | 4           | 0         | 0         | 1         | 9            | 10         | 3         | 0         | 1            | 0          | 4         | 1           | 1          | 5          |
| Ukranian (UkJ)                 | 55         | 1                         | 0        | 13        | 5         | 0         | 0          | 1           | 1         | 0         | 2         | 11           | 9          | 4         | 0         | 0            | 0          | 2         | 0           | 5          | 1          |
| <b>European Non-Jews (NJ)</b>  | <b>348</b> | <b>0</b>                  | <b>0</b> | <b>4</b>  | <b>18</b> | <b>0</b>  | <b>0</b>   | <b>1</b>    | <b>9</b>  | <b>1</b>  | <b>71</b> | <b>4</b>     | <b>21</b>  | <b>2</b>  | <b>0</b>  | <b>12</b>    | <b>0</b>   | <b>1</b>  | <b>5</b>    | <b>92</b>  | <b>107</b> |
| Hungarians (Hun)               | 56         | 0                         | 0        | 0         | 2         | 0         | 0          | 0           | 2         | 1         | 17        | 1            | 4          | 0         | 0         | 0            | 0          | 0         | 1           | 18         | 10         |
| <b>All</b>                     | <b>790</b> | <b>2</b>                  | <b>1</b> | <b>75</b> | <b>30</b> | <b>4</b>  | <b>4</b>   | <b>35</b>   | <b>18</b> | <b>1</b>  | <b>89</b> | <b>88</b>    | <b>105</b> | <b>11</b> | <b>1</b>  | <b>13</b>    | <b>2</b>   | <b>24</b> | <b>11</b>   | <b>125</b> | <b>151</b> |

<sup>a</sup> Haplogroup names are according to Y chromosome consortium nomenclature (YCC et al. 2002).

**Supplementary Material 2**

Y- Chromosome Haplogroup and Haplotype Frequencies in Ashkenazi Jews and Hungarians

| Haplogroup <sup>a</sup>       | Haplotype <sup>b</sup>        | n                             | Population <sup>c</sup> |     |     |     |     |     |     |     |     |     |      |     |
|-------------------------------|-------------------------------|-------------------------------|-------------------------|-----|-----|-----|-----|-----|-----|-----|-----|-----|------|-----|
|                               |                               |                               | FrJ                     | GeJ | NeJ | AuJ | BeJ | LiJ | PoJ | RoJ | RuJ | UkJ | JHun |     |
| E-SRY <sub>4064</sub>         | 16-12-12-18-22-9-12-13-11-16  | 1                             | 1                       | ... | ... | ... | ... | ... | ... | ... | ... | ... | ...  | ... |
|                               | 16-12-12-18-22-9-14-13-11-16  | 1                             | ...                     | ... | ... | ... | ... | ... | ... | ... | ... | ... | 1    | ... |
|                               | sum                           | 2                             | 1                       | ... | ... | ... | ... | ... | ... | ... | ... | ... | 1    | ... |
| E-P1                          | 15-13-13-18-21-10-10-13-11-17 | 1                             | ...                     | ... | ... | ... | ... | 1   | ... | ... | ... | ... | ...  | ... |
|                               | sum                           | 1                             | ...                     | ... | ... | ... | ... | 1   | ... | ... | ... | ... | ...  | ... |
| E-M35                         | 13-12-12-17-24-10-11-14-11-15 | 2                             | ...                     | ... | 1   | ... | ... | ... | ... | ... | 1   | ... | ...  | ... |
|                               | 13-12-12-18-24-10-11-14-11-15 | 2                             | ...                     | ... | ... | ... | ... | ... | ... | ... | 1   | ... | 1    | ... |
|                               | 13-12-12-19-24-10-11-14-11-15 | 3                             | ...                     | ... | ... | 1   | ... | ... | ... | ... | ... | 1   | 1    | ... |
|                               | 13-12-12-19-24-10-11-14-11-16 | 1                             | ...                     | ... | ... | ... | 1   | ... | ... | ... | ... | ... | ...  | ... |
|                               | 13-12-13-17-24-10-11-13-11-16 | 12                            | ...                     | ... | ... | 2   | 2   | 2   | ... | 1   | 2   | 3   | ...  | ... |
|                               | 13-12-13-17-24-9-11-14-11-16  | 1                             | ...                     | ... | ... | ... | ... | ... | ... | 1   | ... | ... | ...  | ... |
|                               | 13-12-13-17-25-10-11-13-11-16 | 1                             | ...                     | ... | ... | ... | 1   | ... | ... | ... | ... | ... | ...  | ... |
|                               | 13-12-13-17-25-9-11-14-11-15  | 2                             | 1                       | ... | ... | ... | ... | ... | 1   | ... | ... | ... | ...  | ... |
|                               | 13-12-13-17-25-9-11-14-11-16  | 18                            | ...                     | ... | ... | 2   | 4   | 2   | ... | 2   | 3   | 5   | ...  | ... |
|                               | 13-12-13-17-25-9-11-14-11-17  | 1                             | ...                     | ... | ... | ... | ... | ... | ... | ... | 1   | ... | ...  | ... |
|                               | 13-12-13-17-25-9-11-14-11-18  | 1                             | ...                     | ... | ... | ... | ... | 1   | ... | ... | ... | ... | ...  | ... |
|                               | 13-12-13-18-22-10-11-13-11-17 | 1                             | ...                     | ... | ... | ... | ... | ... | ... | 1   | ... | ... | ...  | ... |
|                               | 13-12-13-18-22-10-11-14-11-17 | 1                             | ...                     | ... | ... | ... | ... | ... | ... | ... | 1   | ... | ...  | ... |
|                               | 13-12-13-18-24-10-11-12-11-16 | 1                             | ...                     | ... | ... | ... | ... | ... | ... | ... | ... | 1   | ...  | ... |
|                               | 13-12-13-18-24-10-11-13-11-15 | 1                             | ...                     | ... | 1   | ... | ... | ... | ... | ... | ... | ... | ...  | ... |
|                               | 13-12-13-18-24-10-11-13-11-16 | 3                             | 1                       | ... | ... | ... | ... | ... | 1   | 1   | ... | ... | ...  | ... |
|                               | 13-12-13-18-25-10-11-13-11-16 | 3                             | ...                     | 1   | ... | ... | ... | ... | 1   | ... | ... | 1   | ...  | ... |
|                               | 13-12-13-18-25-10-11-13-11-17 | 1                             | ...                     | ... | 1   | ... | ... | ... | ... | ... | ... | ... | ...  | ... |
|                               | 13-12-13-18-25-11-11-13-11-16 | 2                             | 1                       | ... | ... | 1   | ... | ... | ... | ... | ... | ... | ...  | ... |
|                               | 13-12-13-18-25-9-11-14-11-16  | 5                             | ...                     | ... | ... | 1   | ... | 1   | 1   | 1   | ... | 1   | ...  | ... |
|                               | 13-12-13-18-25-9-11-14-11-17  | 1                             | ...                     | ... | ... | ... | ... | ... | ... | 1   | ... | ... | ...  | ... |
|                               | 13-12-14-17-25-10-11-13-11-16 | 1                             | ...                     | ... | ... | ... | ... | ... | ... | ... | 1   | ... | ...  | ... |
|                               | 13-15-13-17-25-9-11-14-11-16  | 1                             | ...                     | ... | ... | ... | 1   | ... | ... | ... | ... | ... | ...  | ... |
|                               | 14-12-14-17-24-9-11-14-11-16  | 1                             | ...                     | ... | ... | ... | ... | ... | ... | ... | ... | 1   | ...  | ... |
|                               | 14-12-14-18-24-10-11-13-11-17 | 4                             | 1                       | ... | ... | 1   | ... | ... | ... | ... | ... | 1   | 1    | ... |
|                               | 14-15-13-18-25-10-11-13-11-16 | 1                             | ...                     | ... | ... | ... | 1   | ... | ... | ... | ... | ... | ...  | ... |
|                               | sum                           | 71                            | 4                       | 1   | 3   | 8   | 10  | 6   | 5   | 10  | 11  | 13  | ...  | ... |
|                               | E-M78                         | 13-12-12-18-23-10-11-13-11-16 | 1                       | ... | ... | ... | ... | ... | ... | ... | ... | ... | 1    | ... |
|                               |                               | 13-12-13-17-24-10-11-13-11-17 | 2                       | ... | ... | ... | ... | ... | ... | ... | ... | ... | 2    | ... |
|                               |                               | 13-12-13-17-24-10-12-13-11-17 | 1                       | ... | 1   | ... | ... | ... | ... | ... | ... | ... | ...  | ... |
| 13-12-13-17-24-11-11-13-11-15 |                               | 1                             | ...                     | ... | ... | ... | ... | ... | ... | ... | ... | 1   | ...  |     |
| 13-12-13-18-24-11-11-12-11-15 |                               | 1                             | ...                     | ... | ... | ... | ... | ... | ... | ... | ... | 1   | ...  |     |
| 13-12-13-18-24-11-11-13-11-15 |                               | 1                             | ...                     | ... | ... | ... | ... | ... | ... | ... | ... | 1   | ...  |     |
| 14-12-12-17-24-10-11-13-11-16 |                               | 1                             | ...                     | ... | ... | ... | ... | ... | ... | 1   | ... | ... | ...  |     |
| 14-12-12-17-24-10-11-14-11-16 |                               | 2                             | ...                     | ... | ... | ... | ... | ... | 1   | ... | ... | 1   | ...  |     |
| 14-12-12-18-24-10-11-14-11-16 | 2                             | ...                           | ...                     | 1   | ... | ... | ... | 1   | ... | ... | ... | ... |      |     |
| sum                           | 12                            | ...                           | 1                       | 1   | ... | ... | ... | 2   | 1   | 2   | 5   | ... |      |     |
| E-M81                         | 13-12-14-16-24-9-11-13-11-13  | 1                             | ...                     | ... | ... | 1   | ... | ... | ... | ... | ... | ... | ...  |     |
|                               | 13-12-14-16-24-9-11-13-11-14  | 1                             | ...                     | ... | ... | ... | 1   | ... | ... | ... | ... | ... | ...  |     |
|                               | 13-12-14-16-25-9-11-13-11-13  | 1                             | ...                     | ... | ... | 1   | ... | ... | ... | ... | ... | ... | ...  |     |
|                               | 13-14-14-16-24-9-11-13-11-14  | 1                             | ...                     | ... | ... | ... | ... | ... | 1   | ... | ... | ... | ...  |     |

|         |                               |    |     |     |     |     |     |     |     |     |     |     |
|---------|-------------------------------|----|-----|-----|-----|-----|-----|-----|-----|-----|-----|-----|
|         | sum                           | 4  | ... | ... | ... | 2   | 1   | ... | 1   | ... | ... | ... |
| F-P14*  | 13-12-13-18-25-10-11-13-11-16 | 1  | 1   | ... | ... | ... | ... | ... | ... | ... | ... | ... |
|         | 15-12-14-17-23-10-11-13-11-15 | 1  | ... | ... | ... | ... | ... | ... | ... | ... | 1   | ... |
|         | 16-12-13-17-25-10-11-13-12-14 | 1  | ... | ... | ... | ... | ... | ... | ... | ... | 1   | ... |
|         | 16-13-13-16-25-10-12-14-11-15 | 1  | ... | ... | ... | 1   | ... | ... | ... | ... | ... | ... |
|         | sum                           | 4  | 1   | ... | ... | 1   | ... | ... | ... | ... | 2   | ... |
| G-M201* | 13-12-13-18-25-11-11-13-11-16 | 1  | ... | ... | ... | ... | ... | ... | ... | 1   | ... | ... |
|         | 14-12-12-16-21-11-12-13-11-15 | 1  | ... | ... | ... | ... | 1   | ... | ... | ... | ... | ... |
|         | 14-12-12-16-23-10-12-14-11-15 | 2  | ... | ... | ... | 1   | ... | 1   | ... | ... | ... | ... |
|         | 14-12-14-18-23-10-11-13-11-15 | 1  | ... | ... | ... | ... | ... | 1   | ... | ... | ... | ... |
|         | 15-12-12-16-23-10-12-14-11-15 | 1  | ... | 1   | ... | ... | ... | ... | ... | ... | ... | ... |
|         | 15-12-13-17-23-10-11-13-11-15 | 1  | ... | ... | ... | ... | ... | ... | 1   | ... | ... | ... |
|         | 15-12-13-18-23-10-11-13-11-15 | 3  | ... | ... | ... | 1   | ... | 2   | ... | ... | ... | ... |
|         | 15-12-14-17-23-10-11-13-11-15 | 4  | 1   | ... | ... | ... | ... | 1   | ... | 1   | ... | 1   |
|         | 15-12-14-18-23-10-11-13-11-15 | 14 | 1   | 2   | 2   | 1   | 1   | ... | 3   | 1   | 3   | ... |
|         | 15-12-14-18-23-10-11-14-11-15 | 1  | ... | ... | ... | 1   | ... | ... | ... | ... | ... | ... |
|         | 15-12-14-18-24-10-11-13-11-15 | 2  | ... | ... | ... | ... | ... | ... | ... | 1   | 1   | ... |
|         | 15-12-14-19-23-10-11-13-11-15 | 1  | ... | ... | ... | ... | ... | ... | 1   | ... | ... | ... |
|         | 16-12-14-17-23-10-11-13-11-15 | 1  | ... | ... | ... | ... | ... | ... | ... | 1   | ... | ... |
|         | 16-12-14-18-23-10-11-13-11-15 | 1  | ... | ... | ... | 1   | ... | ... | ... | ... | ... | ... |
|         | sum                           | 34 | 2   | 3   | 2   | 5   | 2   | 5   | 5   | 5   | 4   | 1   |
| G-P15   | 15-12-12-16-22-10-11-13-11-15 | 1  | ... | ... | ... | ... | 1   | ... | ... | ... | ... | ... |
|         | 15-12-12-16-23-10-11-14-11-18 | 1  | ... | ... | ... | ... | ... | ... | ... | ... | 1   | ... |
|         | 15-12-12-17-21-11-11-14-11-16 | 1  | ... | ... | ... | ... | ... | ... | ... | 1   | ... | ... |
|         | 15-12-12-17-22-10-12-14-11-15 | 1  | ... | 1   | ... | ... | ... | ... | ... | ... | ... | ... |
|         | 15-12-12-18-22-10-11-13-11-15 | 1  | ... | ... | ... | ... | ... | 1   | ... | ... | ... | ... |
|         | 15-12-13-17-22-10-11-13-11-15 | 1  | ... | ... | ... | ... | 1   | ... | ... | ... | ... | ... |
|         | 15-13-12-17-21-10-11-13-11-15 | 1  | ... | ... | ... | ... | ... | ... | ... | ... | ... | 1   |
|         | 15-13-12-17-22-10-11-14-11-17 | 1  | ... | ... | ... | ... | 1   | ... | ... | ... | ... | ... |
|         | 15-13-12-17-23-10-10-14-11-15 | 1  | ... | ... | ... | ... | ... | ... | ... | ... | ... | 1   |
|         | 16-12-12-18-22-10-10-14-11-16 | 1  | ... | ... | ... | ... | 1   | ... | ... | ... | ... | ... |
|         | 16-12-12-19-22-10-10-14-11-16 | 1  | ... | ... | ... | ... | ... | 1   | ... | ... | ... | ... |
|         | sum                           | 11 | ... | 1   | ... | ... | 4   | 1   | 1   | 1   | ... | 1   |
| H-M52   | 15-12-14-16-22-10-11-12-11-15 | 1  | ... | ... | ... | ... | ... | ... | ... | ... | ... | 1   |
|         | sum                           | 1  | ... | ... | ... | ... | ... | ... | ... | ... | ... | 1   |
| I-P19   | 14-13-13-17-22-10-11-13-11-15 | 1  | ... | ... | 1   | ... | ... | ... | ... | ... | ... | ... |
|         | 14-13-13-18-24-11-11-13-11-16 | 1  | ... | ... | ... | ... | ... | ... | ... | ... | ... | 1   |
|         | 14-14-12-16-22-10-11-13-11-15 | 1  | ... | ... | ... | ... | ... | ... | ... | ... | ... | 1   |
|         | 14-14-12-16-22-10-11-13-11-16 | 1  | ... | ... | ... | ... | ... | ... | ... | ... | ... | 1   |
|         | 14-14-12-16-22-10-11-14-11-15 | 1  | ... | 1   | ... | ... | ... | ... | ... | ... | ... | ... |
|         | 14-14-12-16-23-10-11-13-11-15 | 1  | ... | ... | ... | ... | ... | ... | ... | ... | ... | 1   |
|         | 14-14-13-16-23-10-11-13-11-15 | 1  | ... | ... | ... | ... | ... | ... | ... | 1   | ... | ... |
|         | 14-15-12-16-22-10-11-14-11-15 | 1  | ... | ... | 1   | ... | ... | ... | ... | ... | ... | ... |
|         | 15-13-12-17-24-10-11-14-11-15 | 2  | ... | ... | ... | ... | 1   | 1   | ... | ... | ... | ... |
|         | 15-13-13-18-24-11-11-13-11-17 | 2  | ... | ... | ... | ... | ... | ... | ... | ... | ... | 2   |
|         | 15-13-14-17-23-10-12-13-11-15 | 1  | ... | ... | ... | ... | ... | ... | ... | ... | ... | 1   |
|         | 15-14-12-17-22-10-11-13-11-15 | 2  | ... | ... | ... | ... | ... | ... | ... | ... | ... | 2   |
|         | 16-12-13-18-24-11-11-13-11-16 | 1  | ... | ... | ... | ... | ... | ... | ... | ... | ... | 1   |
|         | 16-13-13-16-22-10-12-13-11-15 | 1  | ... | ... | ... | ... | ... | ... | ... | 1   | ... | ... |
|         | 16-13-13-16-22-10-13-13-11-15 | 3  | 1   | ... | 1   | ... | ... | ... | 1   | ... | ... | ... |

|          |                               |    |     |     |     |     |     |     |     |     |     |     |     |
|----------|-------------------------------|----|-----|-----|-----|-----|-----|-----|-----|-----|-----|-----|-----|
|          | 16-13-13-17-24-11-11-13-11-17 | 1  | ... | ... | ... | ... | 1   | ... | ... | ... | ... | ... | ... |
|          | 16-13-13-18-24-10-11-10-11-17 | 1  | ... | ... | ... | ... | ... | ... | ... | ... | ... | ... | 1   |
|          | 16-13-13-18-24-10-11-13-11-17 | 3  | ... | ... | ... | ... | ... | ... | 1   | 1   | ... | ... | 1   |
|          | 16-13-13-18-24-11-11-13-11-16 | 1  | ... | ... | ... | ... | ... | ... | ... | ... | ... | ... | 1   |
|          | 16-13-13-18-24-11-11-13-11-17 | 3  | ... | ... | ... | ... | ... | 1   | ... | ... | 1   | 1   | ... |
|          | 16-13-13-19-24-11-11-13-11-17 | 1  | ... | ... | ... | ... | ... | ... | ... | ... | ... | ... | 1   |
|          | 16-13-13-20-24-10-11-13-11-16 | 1  | ... | ... | ... | ... | ... | ... | ... | ... | ... | ... | 1   |
|          | 16-13-14-15-24-10-11-13-11-16 | 1  | ... | ... | ... | ... | ... | ... | ... | ... | ... | 1   | ... |
|          | 16-16-13-18-24-11-11-13-11-17 | 1  | ... | ... | ... | ... | ... | ... | ... | ... | ... | ... | 1   |
|          | 17-13-13-18-24-11-11-13-11-16 | 1  | ... | ... | ... | ... | ... | ... | ... | ... | ... | ... | 1   |
|          | 17-13-14-15-23-10-11-13-11-17 | 1  | ... | ... | ... | ... | ... | ... | ... | 1   | ... | ... | ... |
|          | sum                           | 35 | 1   | 1   | 3   | ... | 2   | 2   | 2   | 4   | 1   | 2   | 17  |
| J-12f2b* | 13-14-12-17-24-10-11-12-10-17 | 1  | ... | ... | ... | ... | ... | ... | ... | ... | ... | 1   | ... |
|          | 13-15-12-17-24-10-11-12-10-17 | 6  | 1   | ... | ... | ... | ... | ... | 1   | 1   | 1   | 1   | 1   |
|          | 14-14-14-16-25-10-11-12-11-15 | 1  | ... | ... | ... | ... | ... | ... | ... | ... | ... | 1   | ... |
|          | 14-15-13-17-23-10-11-12-11-17 | 1  | ... | ... | ... | 1   | ... | ... | ... | ... | ... | ... | ... |
|          | 14-15-13-18-23-10-11-12-11-15 | 2  | ... | ... | ... | 2   | ... | ... | ... | ... | ... | ... | ... |
|          | 14-15-14-17-22-10-11-12-11-16 | 2  | 1   | 1   | ... | ... | ... | ... | ... | ... | ... | ... | ... |
|          | 14-15-14-17-23-10-11-12-11-16 | 3  | 1   | ... | ... | 2   | ... | ... | ... | ... | ... | ... | ... |
|          | 14-15-14-17-23-10-11-12-11-17 | 3  | ... | ... | ... | ... | 2   | ... | ... | 1   | ... | ... | ... |
|          | 14-16-13-16-23-10-11-12-11-15 | 3  | ... | ... | ... | ... | ... | ... | ... | ... | 2   | 1   | ... |
|          | 14-16-13-16-23-10-11-12-11-16 | 2  | ... | ... | ... | ... | ... | ... | 2   | ... | ... | ... | ... |
|          | 14-16-13-16-24-10-13-12-11-14 | 5  | 3   | ... | ... | ... | 1   | 1   | ... | ... | ... | ... | ... |
|          | 14-16-13-16-25-10-13-12-11-14 | 13 | 2   | 2   | ... | ... | 1   | 3   | 1   | ... | 1   | 3   | ... |
|          | 14-16-13-16-25-10-13-12-11-15 | 1  | ... | 1   | ... | ... | ... | ... | ... | ... | ... | ... | ... |
|          | 14-16-13-16-26-10-13-12-11-14 | 1  | ... | ... | 1   | ... | ... | ... | ... | ... | ... | ... | ... |
|          | 14-16-13-17-23-10-11-12-11-16 | 14 | 2   | 2   | 2   | 2   | ... | 1   | 2   | 2   | 1   | ... | ... |
|          | 14-16-13-17-23-10-11-12-11-17 | 1  | ... | 1   | ... | ... | ... | ... | ... | ... | ... | ... | ... |
|          | 14-16-13-17-23-10-9-12-11-16  | 1  | ... | ... | ... | ... | ... | ... | 1   | ... | ... | ... | ... |
|          | 14-16-13-17-23-11-11-12-11-15 | 1  | ... | ... | ... | ... | ... | ... | ... | ... | 1   | ... | ... |
|          | 14-16-13-17-24-10-11-12-11-15 | 1  | ... | ... | ... | ... | ... | ... | ... | ... | 1   | ... | ... |
|          | 14-16-13-18-22-10-11-12-11-15 | 1  | ... | ... | ... | ... | ... | 1   | ... | ... | ... | ... | ... |
|          | 14-16-13-18-23-10-11-12-11-15 | 4  | ... | ... | ... | 1   | ... | ... | 1   | ... | ... | 2   | ... |
|          | 14-16-13-19-23-10-11-12-11-15 | 2  | ... | ... | ... | ... | ... | ... | ... | 1   | 1   | ... | ... |
|          | 14-16-13-19-23-10-11-12-11-16 | 1  | 1   | ... | ... | ... | ... | ... | ... | ... | ... | ... | ... |
|          | 14-16-14-16-25-10-13-12-11-14 | 2  | ... | ... | ... | ... | ... | ... | ... | ... | 1   | 1   | ... |
|          | 14-16-14-17-23-10-11-12-11-16 | 1  | ... | ... | ... | ... | ... | ... | ... | ... | ... | 1   | ... |
|          | 14-16-14-17-23-10-11-12-11-17 | 1  | 1   | ... | ... | ... | ... | ... | ... | ... | ... | ... | ... |
|          | 14-17-13-16-23-10-11-12-11-16 | 2  | ... | 1   | ... | ... | ... | ... | ... | 1   | ... | ... | ... |
|          | 14-17-13-17-25-10-11-12-11-16 | 1  | ... | ... | ... | ... | ... | ... | ... | 1   | ... | ... | ... |
|          | 14-17-13-18-23-10-11-12-11-15 | 1  | ... | 1   | ... | ... | ... | ... | ... | ... | ... | ... | ... |
|          | 14-18-13-15-23-10-11-12-11-16 | 1  | ... | ... | ... | ... | ... | ... | 1   | ... | ... | ... | ... |
|          | 14-18-13-16-23-10-11-12-11-15 | 1  | 1   | ... | ... | ... | ... | ... | ... | ... | ... | ... | ... |
|          | 14-18-13-17-24-10-11-12-11-17 | 1  | ... | ... | ... | ... | ... | ... | ... | 1   | ... | ... | ... |
|          | 15-15-13-17-22-10-11-12-11-15 | 1  | ... | ... | ... | ... | 1   | ... | ... | ... | ... | ... | ... |
|          | 15-15-14-17-22-10-11-12-11-16 | 1  | ... | 1   | ... | ... | ... | ... | ... | ... | ... | ... | ... |
|          | 15-16-13-17-25-10-13-12-11-14 | 1  | ... | ... | ... | ... | ... | ... | 1   | ... | ... | ... | ... |
|          | 15-17-13-18-24-10-11-12-11-15 | 1  | ... | 1   | ... | ... | ... | ... | ... | ... | ... | ... | ... |
|          | sum                           | 85 | 13  | 11  | 3   | 8   | 5   | 6   | 10  | 8   | 9   | 11  | 1   |
| J-M172   | 13-15-14-19-23-10-11-12-11-15 | 1  | ... | ... | ... | 1   | ... | ... | ... | ... | ... | ... | ... |

|          |                               |    |     |     |     |     |     |     |     |     |     |     |     |
|----------|-------------------------------|----|-----|-----|-----|-----|-----|-----|-----|-----|-----|-----|-----|
|          | 14-14-14-16-25-10-11-12-11-15 | 1  | ... | ... | ... | ... | ... | ... | ... | ... | 1   | ... |     |
|          | 14-15-13-16-23-10-11-12-11-16 | 1  | ... | ... | ... | ... | ... | ... | ... | ... | ... | 1   |     |
|          | 14-15-13-17-22-10-11-12-11-16 | 1  | ... | ... | ... | ... | ... | ... | ... | 1   | ... | ... |     |
|          | 14-15-13-18-22-10-11-12-11-15 | 1  | ... | ... | ... | ... | ... | 1   | ... | ... | ... | ... |     |
|          | 14-15-14-16-22-10-11-12-11-16 | 1  | ... | ... | ... | ... | ... | ... | ... | 1   | ... | ... |     |
|          | 14-15-14-16-25-10-11-12-11-15 | 3  | 2   | 1   | ... | ... | ... | ... | ... | ... | ... | ... |     |
|          | 14-15-14-17-22-10-11-12-11-15 | 1  | ... | ... | ... | ... | ... | ... | 1   | ... | ... | ... |     |
|          | 14-15-14-17-22-10-11-12-11-16 | 13 | 4   | 1   | ... | ... | 2   | 2   | 2   | 2   | ... | ... |     |
|          | 14-15-14-17-22-10-13-12-11-16 | 1  | ... | ... | ... | ... | ... | 1   | ... | ... | ... | ... |     |
|          | 14-15-14-17-25-10-11-12-11-15 | 1  | ... | ... | ... | ... | ... | ... | ... | ... | 1   | ... |     |
|          | 14-15-15-17-22-10-11-12-11-16 | 1  | 1   | ... | ... | ... | ... | ... | ... | ... | ... | ... |     |
|          | 14-16-13-16-23-10-11-12-11-15 | 1  | ... | ... | ... | ... | 1   | ... | ... | ... | ... | ... |     |
|          | 14-16-13-17-23-10-11-12-11-15 | 16 | 3   | 1   | ... | 1   | 2   | 2   | 3   | 1   | 2   | 1   | ... |
|          | 14-16-13-17-23-11-11-12-11-15 | 1  | ... | ... | ... | ... | 1   | ... | ... | ... | ... | ... |     |
|          | 14-16-13-18-23-10-11-12-11-15 | 4  | ... | ... | ... | ... | ... | 1   | 1   | 2   | ... | ... |     |
|          | 14-16-14-17-23-10-11-12-11-15 | 4  | ... | ... | ... | ... | ... | 1   | 2   | 1   | ... | ... |     |
|          | 15-14-13-16-23-9-11-12-11-15  | 1  | ... | ... | ... | ... | ... | 1   | ... | ... | ... | ... |     |
|          | 15-14-13-17-22-11-11-13-11-16 | 1  | ... | ... | ... | ... | ... | ... | ... | ... | ... | 1   |     |
|          | 15-15-12-16-23-10-11-12-11-15 | 3  | ... | ... | ... | ... | ... | 1   | 1   | ... | 1   | ... |     |
|          | 15-15-12-16-24-10-11-12-11-15 | 2  | ... | ... | ... | 1   | ... | ... | ... | ... | ... | 1   |     |
|          | 15-15-12-16-24-10-11-12-11-16 | 2  | ... | ... | 1   | ... | ... | 1   | ... | ... | ... | ... |     |
|          | 15-15-12-17-24-10-11-12-11-16 | 1  | ... | ... | ... | 1   | ... | ... | ... | ... | ... | ... |     |
|          | 15-15-12-17-24-10-11-13-11-16 | 1  | ... | ... | ... | ... | ... | ... | ... | ... | 1   | ... |     |
|          | 15-15-12-18-23-10-11-12-11-15 | 1  | ... | ... | ... | ... | ... | 1   | ... | ... | ... | ... |     |
|          | 15-15-14-16-25-10-11-12-11-15 | 1  | ... | ... | ... | ... | ... | 1   | ... | ... | ... | ... |     |
|          | 15-15-14-17-22-10-11-12-11-16 | 2  | 1   | ... | ... | ... | ... | ... | 1   | ... | ... | ... |     |
|          | 15-15-14-18-22-10-11-12-11-16 | 1  | 1   | ... | ... | ... | ... | ... | ... | ... | ... | ... |     |
|          | 15-16-12-17-24-10-11-13-11-16 | 1  | ... | ... | ... | ... | ... | ... | 1   | ... | ... | ... |     |
|          | 15-16-13-16-23-9-11-12-11-15  | 5  | ... | ... | ... | ... | 1   | 1   | ... | 1   | 1   | 1   |     |
|          | 15-16-13-16-23-9-11-12-11-16  | 3  | ... | ... | ... | ... | 1   | ... | 1   | ... | 1   | ... |     |
|          | 15-16-13-16-23-9-11-13-11-16  | 1  | ... | ... | ... | ... | ... | 1   | ... | ... | ... | ... |     |
|          | 15-16-13-16-23-9-12-12-11-15  | 1  | 1   | ... | ... | ... | ... | ... | ... | ... | ... | ... |     |
|          | 15-16-13-16-24-10-11-12-11-17 | 1  | ... | ... | ... | ... | ... | 1   | ... | ... | ... | ... |     |
|          | 15-16-13-17-22-10-11-13-11-15 | 4  | ... | ... | ... | ... | ... | ... | 1   | 3   | ... | ... |     |
|          | 15-16-14-16-23-10-11-12-11-16 | 2  | ... | ... | ... | ... | ... | ... | ... | ... | 2   | ... |     |
|          | 16-15-14-17-22-11-11-12-11-16 | 1  | ... | ... | 1   | ... | ... | ... | ... | ... | ... | ... |     |
|          | 16-16-13-16-24-11-11-12-11-17 | 1  | 1   | ... | ... | ... | ... | ... | ... | ... | ... | ... |     |
|          | sum                           | 88 | 14  | 3   | 2   | 4   | 5   | 8   | 18  | 11  | 10  | 9   | 4   |
| K-M9*    | 13-12-13-15-23-10-13-13-11-16 | 1  | ... | ... | ... | ... | ... | ... | ... | ... | 1   | ... |     |
|          | 13-12-14-17-22-10-13-13-11-16 | 2  | ... | ... | ... | ... | 1   | ... | ... | ... | 1   | ... |     |
|          | 14-12-12-15-23-10-13-13-11-16 | 1  | ... | ... | ... | ... | ... | ... | ... | 1   | ... | ... |     |
|          | 14-12-12-17-23-10-13-13-11-16 | 1  | ... | ... | ... | ... | ... | 1   | ... | ... | ... | ... |     |
|          | 14-12-12-18-23-10-13-13-11-16 | 1  | ... | ... | ... | ... | ... | ... | ... | ... | 1   | ... |     |
|          | 14-14-14-17-23-10-13-13-11-15 | 2  | ... | ... | ... | ... | ... | ... | ... | ... | 2   | ... |     |
|          | 15-12-13-17-23-11-13-14-11-15 | 1  | ... | ... | ... | ... | ... | ... | ... | 1   | ... | ... |     |
|          | sum                           | 9  | ... | ... | ... | ... | 1   | ... | 1   | ... | 3   | 4   | ... |
| L-M20    | 14-12-15-16-23-10-14-12-11-16 | 1  | ... | 1   | ... | ... | ... | ... | ... | ... | ... | ... |     |
|          | sum                           | 1  | ... | 1   | ... | ... | ... | ... | ... | ... | ... | ... |     |
| N-LLY22g | 14-12-14-16-23-11-14-14-11-14 | 1  | ... | ... | ... | ... | ... | ... | ... | 1   | ... | ... |     |
|          | sum                           | 1  | ... | ... | ... | ... | ... | ... | ... | 1   | ... | ... |     |

|                               |                               |                               |     |     |     |     |     |     |     |     |     |     |     |
|-------------------------------|-------------------------------|-------------------------------|-----|-----|-----|-----|-----|-----|-----|-----|-----|-----|-----|
| P-P27*                        | 14-12-14-15-23-10-10-14-12-15 | 1                             | ... | ... | ... | ... | 1   | ... | ... | ... | ... | ... |     |
|                               | 15-12-14-15-23-10-10-14-12-15 | 1                             | ... | 1   | ... | ... | ... | ... | ... | ... | ... | ... |     |
|                               | sum                           | 2                             | ... | 1   | ... | ... | 1   | ... | ... | ... | ... | ... |     |
| Q-P36                         | 13-12-13-16-22-10-15-13-12-16 | 19                            | 3   | 4   | ... | 1   | 1   | 1   | 3   | 1   | 4   | 1   | ... |
|                               | 13-12-13-16-22-10-15-14-12-16 | 3                             | ... | ... | ... | ... | ... | ... | 1   | 1   | ... | 1   | ... |
|                               | 14-12-13-16-22-10-15-13-12-16 | 1                             | ... | 1   | ... | ... | ... | ... | ... | ... | ... | ... | ... |
|                               | sum                           | 23                            | 3   | 5   | ... | 1   | 1   | 1   | 4   | 2   | 4   | 2   | ... |
| R-M173*                       | 14-12-13-15-24-10-14-12-12-16 | 1                             | ... | 1   | ... | ... | ... | ... | ... | ... | ... | ... | ... |
|                               | 14-12-13-16-24-10-13-13-12-16 | 1                             | 1   | ... | ... | ... | ... | ... | ... | ... | ... | ... | ... |
|                               | 14-12-13-16-24-10-14-12-11-16 | 1                             | ... | 1   | ... | ... | ... | ... | ... | ... | ... | ... | ... |
|                               | 14-12-13-16-24-11-13-13-12-17 | 1                             | 1   | ... | ... | ... | ... | ... | ... | ... | ... | ... | ... |
|                               | 14-12-13-16-24-9-13-13-12-16  | 1                             | ... | ... | ... | ... | ... | ... | ... | ... | 1   | ... | ... |
|                               | 14-12-13-17-24-11-13-12-12-17 | 1                             | ... | 1   | ... | ... | ... | ... | ... | ... | ... | ... | ... |
|                               | 15-12-13-17-24-11-11-14-12-14 | 1                             | ... | ... | ... | ... | ... | ... | ... | ... | ... | ... | 1   |
|                               | sum                           | 7                             | 2   | 3   | ... | ... | ... | ... | ... | ... | 1   | ... | 1   |
| R-M17                         | 15-12-12-17-24-10-11-13-12-14 | 1                             | ... | ... | ... | ... | ... | ... | ... | ... | ... | ... | 1   |
|                               | 15-12-13-16-25-10-11-13-12-14 | 1                             | ... | ... | 1   | ... | ... | ... | ... | ... | ... | ... | ... |
|                               | 15-12-13-16-25-10-11-13-12-15 | 1                             | ... | ... | ... | 1   | ... | ... | ... | ... | ... | ... | ... |
|                               | 15-12-13-16-26-10-11-13-12-15 | 1                             | ... | ... | ... | ... | ... | ... | ... | ... | ... | ... | 1   |
|                               | 15-12-13-16-26-11-11-13-12-15 | 1                             | ... | ... | ... | ... | ... | ... | ... | ... | ... | ... | 1   |
|                               | 15-12-13-17-24-10-11-13-12-14 | 1                             | 1   | ... | ... | ... | ... | ... | ... | ... | ... | ... | ... |
|                               | 15-12-13-17-24-10-11-13-12-15 | 1                             | ... | ... | ... | ... | ... | ... | ... | ... | ... | ... | 1   |
|                               | 15-12-13-17-24-12-11-13-12-14 | 1                             | ... | ... | ... | ... | ... | ... | ... | ... | ... | ... | 1   |
|                               | 15-12-13-17-25-10-11-13-12-14 | 1                             | ... | 1   | ... | ... | ... | ... | ... | ... | ... | ... | ... |
|                               | 15-12-13-17-25-11-11-13-12-14 | 1                             | ... | ... | ... | ... | ... | ... | ... | ... | ... | ... | 1   |
|                               | 15-12-13-18-25-10-11-13-12-14 | 1                             | ... | ... | ... | ... | ... | ... | ... | ... | ... | ... | 1   |
|                               | 15-12-13-18-25-11-11-14-12-15 | 1                             | ... | ... | ... | ... | ... | ... | ... | ... | 1   | ... | ... |
|                               | 15-12-14-18-24-11-11-13-12-14 | 1                             | ... | ... | ... | ... | ... | ... | ... | ... | ... | ... | 1   |
|                               | 16-11-13-18-25-11-11-14-12-15 | 1                             | ... | ... | ... | ... | ... | ... | ... | ... | ... | ... | 1   |
|                               | 16-12-13-16-24-12-11-13-12-14 | 1                             | ... | ... | ... | ... | ... | ... | ... | ... | ... | ... | 1   |
|                               | 16-12-13-16-25-10-11-13-12-14 | 3                             | ... | ... | 1   | ... | 1   | ... | 1   | ... | ... | ... | ... |
|                               | 16-12-13-16-25-10-11-13-12-15 | 2                             | ... | 1   | ... | ... | ... | ... | ... | 1   | ... | ... | ... |
|                               | 16-12-13-16-25-11-11-13-12-14 | 1                             | ... | ... | ... | ... | ... | ... | ... | ... | ... | 1   | ... |
|                               | 16-12-13-16-25-11-11-13-12-15 | 1                             | ... | ... | ... | 1   | ... | ... | ... | ... | ... | ... | ... |
|                               | 16-12-13-17-24-10-11-13-12-14 | 1                             | ... | ... | ... | ... | ... | ... | ... | ... | ... | ... | 1   |
|                               | 16-12-13-17-24-11-11-13-12-14 | 1                             | ... | ... | ... | ... | ... | ... | ... | ... | ... | 1   | ... |
|                               | 16-12-13-17-25-10-11-13-12-14 | 17                            | 3   | 2   | 1   | 1   | 1   | ... | 3   | 1   | ... | 3   | 2   |
|                               | 16-12-13-17-25-10-11-13-12-15 | 3                             | ... | ... | ... | 3   | ... | ... | ... | ... | ... | ... | ... |
|                               | 16-12-13-17-25-10-11-13-12-16 | 1                             | ... | ... | ... | ... | ... | ... | ... | ... | ... | ... | 1   |
|                               | 16-12-13-18-24-10-11-12-12-14 | 1                             | ... | ... | ... | ... | ... | ... | 1   | ... | ... | ... | ... |
|                               | 16-12-14-17-24-11-11-13-12-14 | 1                             | ... | ... | ... | ... | ... | ... | ... | ... | ... | ... | 1   |
|                               | 16-13-13-17-25-9-11-13-12-16  | 1                             | ... | ... | ... | ... | ... | ... | ... | ... | ... | ... | 1   |
|                               | 17-12-13-17-25-10-11-13-12-14 | 1                             | ... | ... | ... | ... | ... | ... | 1   | ... | ... | ... | ... |
|                               | 17-12-14-17-25-10-11-13-12-14 | 1                             | ... | ... | ... | ... | ... | ... | ... | ... | ... | ... | 1   |
|                               | 18-12-13-17-25-10-11-13-12-14 | 1                             | ... | ... | ... | ... | ... | ... | ... | ... | ... | ... | 1   |
|                               | sum                           | 51                            | 4   | 4   | 3   | 6   | 2   | ... | 6   | 2   | 1   | 5   | 18  |
|                               | R-P25                         | 13-12-13-16-24-11-13-13-12-14 | 1   | ... | 1   | ... | ... | ... | ... | ... | ... | ... | ... |
| 14-11-13-16-24-11-14-13-12-15 |                               | 1                             | ... | ... | ... | ... | 1   | ... | ... | ... | ... | ... |     |
| 14-12-12-16-24-11-13-13-12-16 |                               | 2                             | ... | ... | 1   | ... | ... | ... | ... | ... | ... | 1   |     |
| 14-12-13-15-23-11-13-13-12-16 |                               | 2                             | ... | ... | ... | 1   | ... | 1   | ... | ... | ... | ... |     |

|                               |     |     |     |     |     |     |     |     |     |     |     |     |
|-------------------------------|-----|-----|-----|-----|-----|-----|-----|-----|-----|-----|-----|-----|
| 14-12-13-15-24-10-14-12-11-16 | 1   | ... | ... | ... | 1   | ... | ... | ... | ... | ... | ... | ... |
| 14-12-13-15-24-10-14-12-12-16 | 4   | 2   | 1   | ... | ... | ... | ... | ... | 1   | ... | ... | ... |
| 14-12-13-15-24-11-13-13-12-15 | 3   | ... | ... | ... | ... | ... | ... | ... | 2   | ... | 1   | ... |
| 14-12-13-15-25-10-14-12-12-16 | 1   | ... | ... | ... | ... | ... | ... | ... | 1   | ... | ... | ... |
| 14-12-13-16-23-10-13-13-12-16 | 1   | ... | ... | 1   | ... | ... | ... | ... | ... | ... | ... | ... |
| 14-12-13-16-23-10-13-13-12-17 | 1   | 1   | ... | ... | ... | ... | ... | ... | ... | ... | ... | ... |
| 14-12-13-16-23-11-13-13-13-16 | 1   | ... | ... | ... | ... | ... | ... | ... | ... | ... | ... | 1   |
| 14-12-13-16-23-11-13-14-12-17 | 1   | ... | ... | ... | ... | ... | 1   | ... | ... | ... | ... | ... |
| 14-12-13-16-24-10-13-13-12-16 | 2   | ... | ... | 1   | ... | 1   | ... | ... | ... | ... | ... | ... |
| 14-12-13-16-24-10-14-12-11-16 | 3   | ... | ... | ... | 1   | 2   | ... | ... | ... | ... | ... | ... |
| 14-12-13-16-24-10-14-12-11-17 | 2   | ... | ... | ... | ... | 1   | ... | 1   | ... | ... | ... | ... |
| 14-12-13-16-24-10-15-12-11-16 | 1   | 1   | ... | ... | ... | ... | ... | ... | ... | ... | ... | ... |
| 14-12-13-16-24-11-13-12-12-16 | 1   | ... | ... | 1   | ... | ... | ... | ... | ... | ... | ... | ... |
| 14-12-13-16-24-11-13-13-12-15 | 3   | ... | ... | 1   | ... | ... | ... | ... | 1   | 1   | ... | ... |
| 14-12-13-16-24-11-13-13-12-16 | 4   | ... | ... | ... | 1   | ... | ... | ... | 2   | ... | 1   | ... |
| 14-12-13-16-24-11-14-13-13-15 | 1   | ... | ... | ... | ... | 1   | ... | ... | ... | ... | ... | ... |
| 14-12-13-16-24-14-14-13-13-15 | 1   | ... | ... | ... | ... | ... | 1   | ... | ... | ... | ... | ... |
| 14-12-13-16-25-11-13-13-12-16 | 1   | ... | ... | 1   | ... | ... | ... | ... | ... | ... | ... | ... |
| 14-12-13-17-24-11-13-12-12-16 | 1   | ... | ... | ... | ... | ... | ... | ... | ... | ... | ... | 1   |
| 14-12-14-16-23-11-13-12-12-15 | 1   | ... | ... | ... | ... | ... | ... | 1   | ... | ... | ... | ... |
| 14-12-14-16-23-11-13-13-12-17 | 1   | ... | ... | ... | ... | ... | ... | ... | ... | ... | ... | 1   |
| 14-12-14-16-24-11-13-13-12-16 | 1   | ... | 1   | ... | ... | ... | ... | ... | ... | ... | ... | ... |
| 15-12-13-15-22-10-14-13-12-16 | 1   | ... | ... | ... | ... | ... | ... | ... | ... | ... | ... | 1   |
| 15-12-13-15-24-11-13-13-12-15 | 1   | ... | ... | ... | ... | ... | 1   | ... | ... | ... | ... | ... |
| 15-12-13-16-24-10-13-13-11-16 | 1   | ... | 1   | ... | ... | ... | ... | ... | ... | ... | ... | ... |
| 15-12-13-16-24-11-13-12-11-16 | 1   | ... | ... | ... | ... | ... | ... | ... | ... | ... | ... | 1   |
| 15-12-13-16-25-10-13-13-11-16 | 1   | ... | ... | ... | ... | ... | ... | ... | 1   | ... | ... | ... |
| 15-12-13-16-25-11-13-12-11-16 | 1   | ... | ... | ... | ... | ... | ... | ... | ... | ... | ... | 1   |
| 15-12-14-16-24-11-14-12-12-16 | 1   | ... | ... | ... | ... | ... | 1   | ... | ... | ... | ... | ... |
| 16-12-13-15-23-10-13-13-11-15 | 1   | ... | ... | ... | ... | ... | 1   | ... | ... | ... | ... | ... |
| 16-12-13-16-25-11-13-12-11-16 | 1   | ... | ... | ... | ... | ... | ... | ... | ... | ... | ... | 1   |
| 16-12-13-17-25-10-11-13-12-14 | 1   | ... | ... | ... | ... | 1   | ... | ... | ... | ... | ... | ... |
| 16-12-14-15-23-10-13-13-11-16 | 2   | 1   | ... | ... | ... | ... | ... | 1   | ... | ... | ... | ... |
| sum                           | 54  | 5   | 4   | 6   | 4   | 6   | 7   | 3   | 3   | 5   | 1   | 10  |
| Total                         | 496 | 50  | 39  | 23  | 39  | 40  | 37  | 58  | 47  | 54  | 55  | 54  |

<sup>a</sup> Haplogroup names are according to Y chromosome consortium nomenclature (YCC et al. 2002).

<sup>b</sup> 10-locus haplotype made up of repeat sizes of microsatellite loci in the following order: DYS19, DYS388, DYS389-I, DYS389-II, DYS390, DYS391, DYS392, DYS393, DYS426, DYS439. Haplotypes were constructed only for those samples for which all 10 STRs could be technically determined.

<sup>c</sup> Population sample labels are as defined under Subjects and Methods/ Population samples.
